# Supplementary material for: Autophagy prevents hippocampal α-synuclein oligomerization and early cognitive dysfunction after anesthesia/surgery in aged rats
Source: publisher site journal article supplement (doi:10.18632/aging.103074), 2020-04-26
Supplement: Supplementary file [file aging-v12i8-103074-supplementary-material-SD2.pdf]

## SUPPLEMENTARY TABLES

**Supplementary Table 1. Effects of propofol anesthesia alone on blood gas and blood glucose in aged rats.**

| Group          | n | PH        | PaCO <sub>2</sub><br>(mmHg) | PaO <sub>2</sub><br>(mmHg) | SaO <sub>2</sub> (%) | Hb (g/L)   | Glucose<br>(mmol/L) |
|----------------|---|-----------|-----------------------------|----------------------------|----------------------|------------|---------------------|
| CON            | 6 | 7.35±0.02 | 41.1±3.3                    | 157.3±14.0                 | 96.7±2.5             | 151.7±14.5 | 6.3±0.6             |
| PRO4           | 6 | 7.39±0.07 | 42.9±3.7                    | 153.3± 8.2                 | 95.7±1.6             | 146.3± 7.7 | 6.2±0.7             |
| CON+RAP        | 6 | 7.37±0.04 | 41.7±1.4                    | 155.7±14.6                 | 97.0±1.0             | 151.4±10.0 | 6.2±0.3             |
| PRO4+RAP       | 6 | 7.38±0.02 | 42.4±3.0                    | 154.7±11.5                 | 95.1±0.69            | 148.8± 7.9 | 6.0±0.5             |
| <i>P</i> Value |   | 0.491     | 0.367                       | 0.270                      | 0.240                | 0.929      | 0.850               |

Propofol intravenous anesthesia for 2 or 4 hours had no significant effect on blood gas and blood glucose in aged rats, and this was not influenced by rapamycin. PaCO<sub>2</sub>, partial pressure of carbon dioxide in arterial blood; PaO<sub>2</sub>, partial pressure of oxygen in arterial blood; SaO<sub>2</sub>, arterial oxygen saturation; Hb, hemoglobin; Glucose, blood glucose. CON: the control group, CON+RAP: the control+rapamycin group, PRO4: the 4-h propofol anesthesia group, PRO4+RAP: the 4-h propofol anesthesia+rapamycin group. Values are shown mean± SEM (n = 6/group).

**Supplementary Table 2. Effects of propofol anesthesia and surgery on blood gas and blood glucose in aged rats.**

| Group          | n | PH        | PaCO <sub>2</sub><br>(mmHg) | PaO <sub>2</sub><br>(mmHg) | SaO <sub>2</sub> (%) | Hb (g/L)   | Glucose<br>(mmol/L) |
|----------------|---|-----------|-----------------------------|----------------------------|----------------------|------------|---------------------|
| CON            | 6 | 7.34±0.04 | 42.1±2.7                    | 158.1±13.6                 | 96.1±3.5             | 149.7±10.5 | 6.4±0.5             |
| PRO2S          | 6 | 7.38±0.06 | 42.7±3.9                    | 154.7±9.2                  | 95.9±2.3             | 143.3± 5.7 | 6.4±0.7             |
| CON+RAP        | 6 | 7.35±0.04 | 42.3±3.0                    | 158.7±10.5                 | 96.9±1.39            | 149.8± 8.4 | 6.2±0.7             |
| PRO2S+RAP      | 6 | 7.37±0.06 | 42.7±3.4                    | 155.7±14.6                 | 95.0±1.0             | 150.4±10.5 | 6.2±0.4             |
| <i>p</i> value |   | 0.497     | 0.387                       | 0.283                      | 0.276                | 0.892      | 0.861               |

Intravenous propofol anesthesia for 2 hours combined with laparotomy had no significant effect on blood gas and blood glucose in aged rats, and this was not influenced by rapamycin. PaCO<sub>2</sub>, partial pressure of carbon dioxide in arterial blood; PaO<sub>2</sub>, partial pressure of oxygen in arterial blood; SaO<sub>2</sub>, arterial oxygen saturation; Hb, hemoglobin; Glucose, blood glucose. CON: the control group, CON + RAP: the control + rapamycin group, PRO2S: the 2-h propofol anesthesia+surgery group, PRO2S+RAP: the 2-h propofol anesthesia+surgery+rapamycin group. Values are shown mean± SEM (n = 6/group).
